# Supplementary material for: Antibacterial and Antiyeast Compounds from Marine-Derived Bacteria
Source: MDPI journal article supplement (doi:10.3390/md12052913), 2014-05-13

# Supplementary Information

**Figure S1.** HRESIMS spectrum of compound **1**.

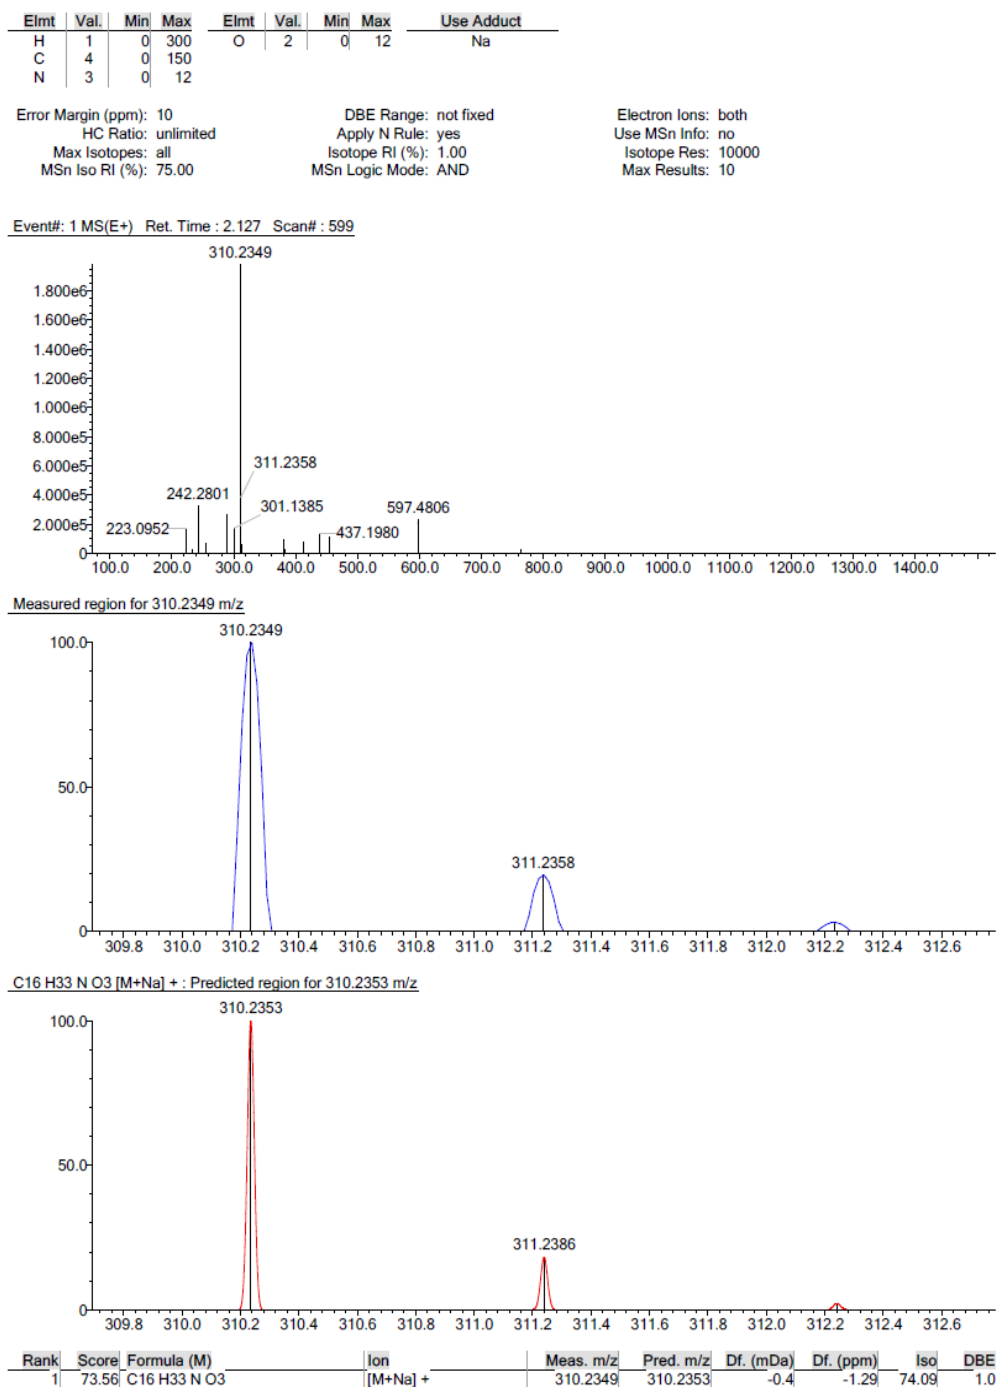

**Figure S2.**  $^1\text{H}$  NMR spectrum of compound **1** recorded in  $\text{CD}_3\text{OD}$  at 500 MHz.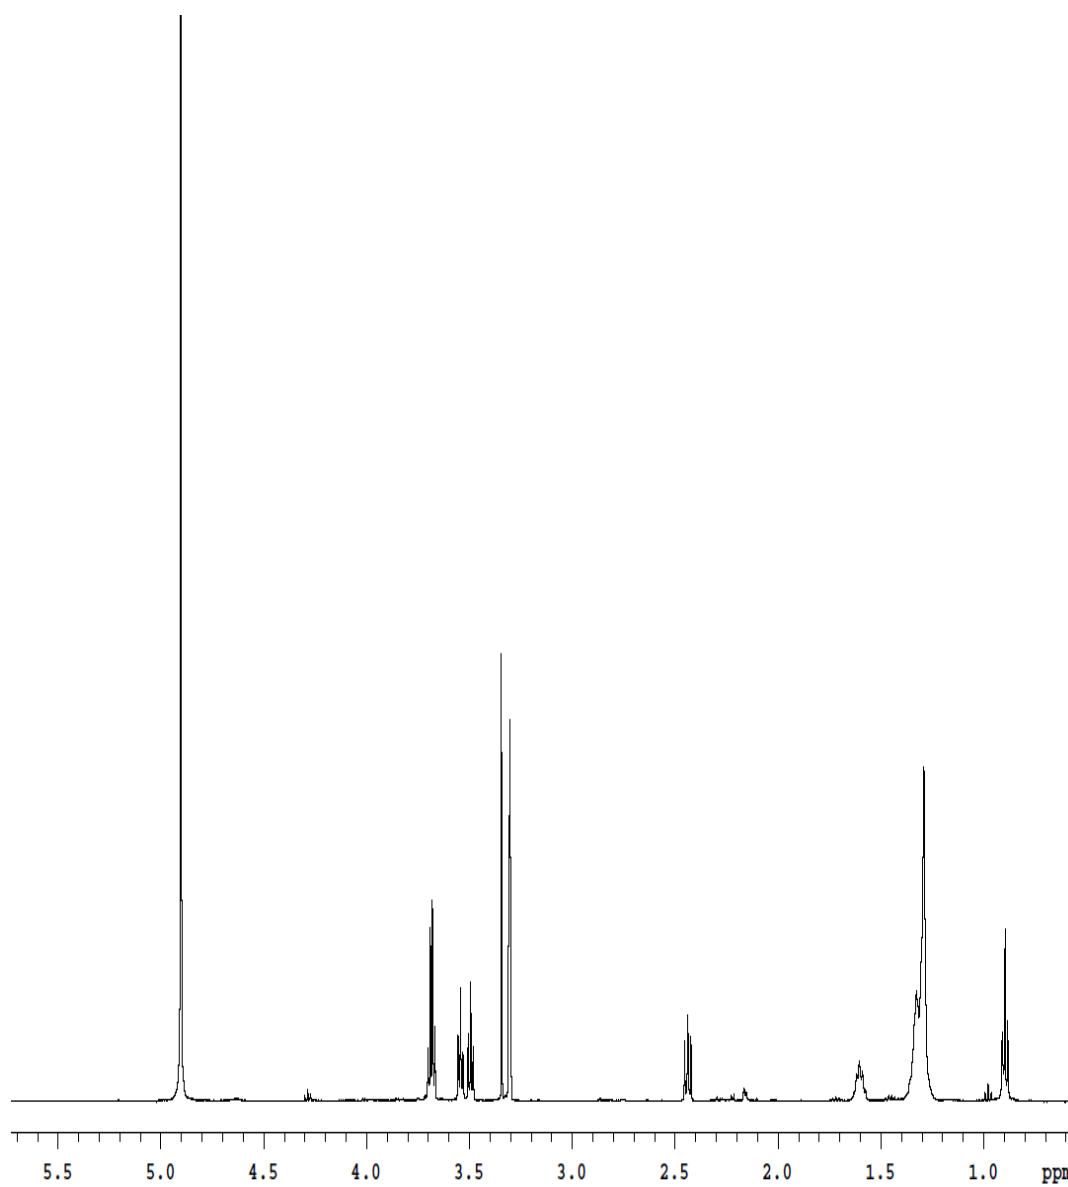

**Figure S3.**  $^{13}\text{C}$  NMR spectrum of compound **1** recorded in  $\text{CD}_3\text{OD}$  at 125 MHz.

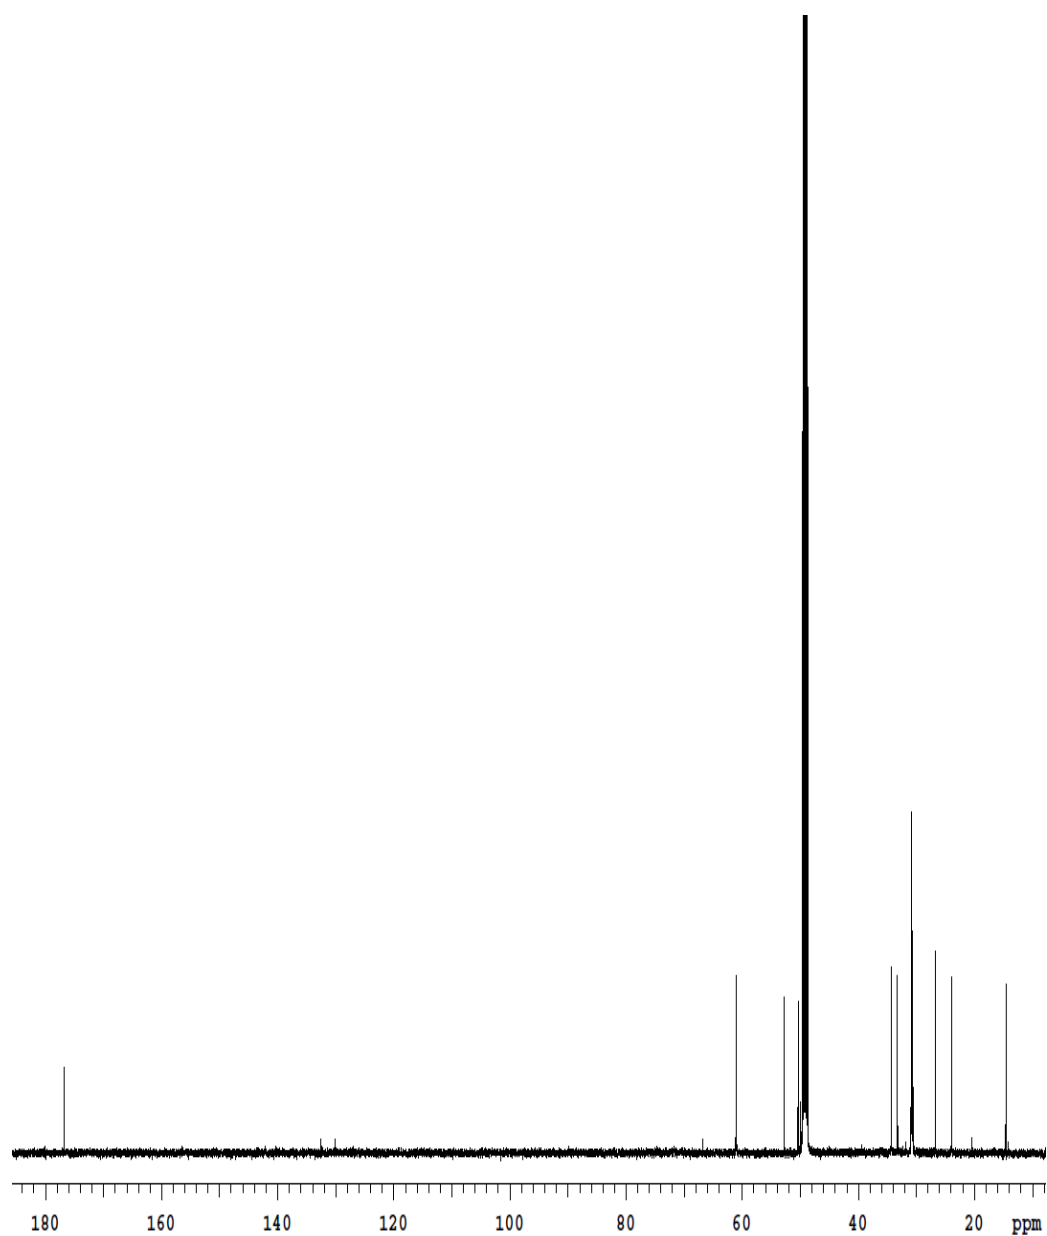

**Figure S4.** COSY spectrum of compound **1** in CD<sub>3</sub>OD.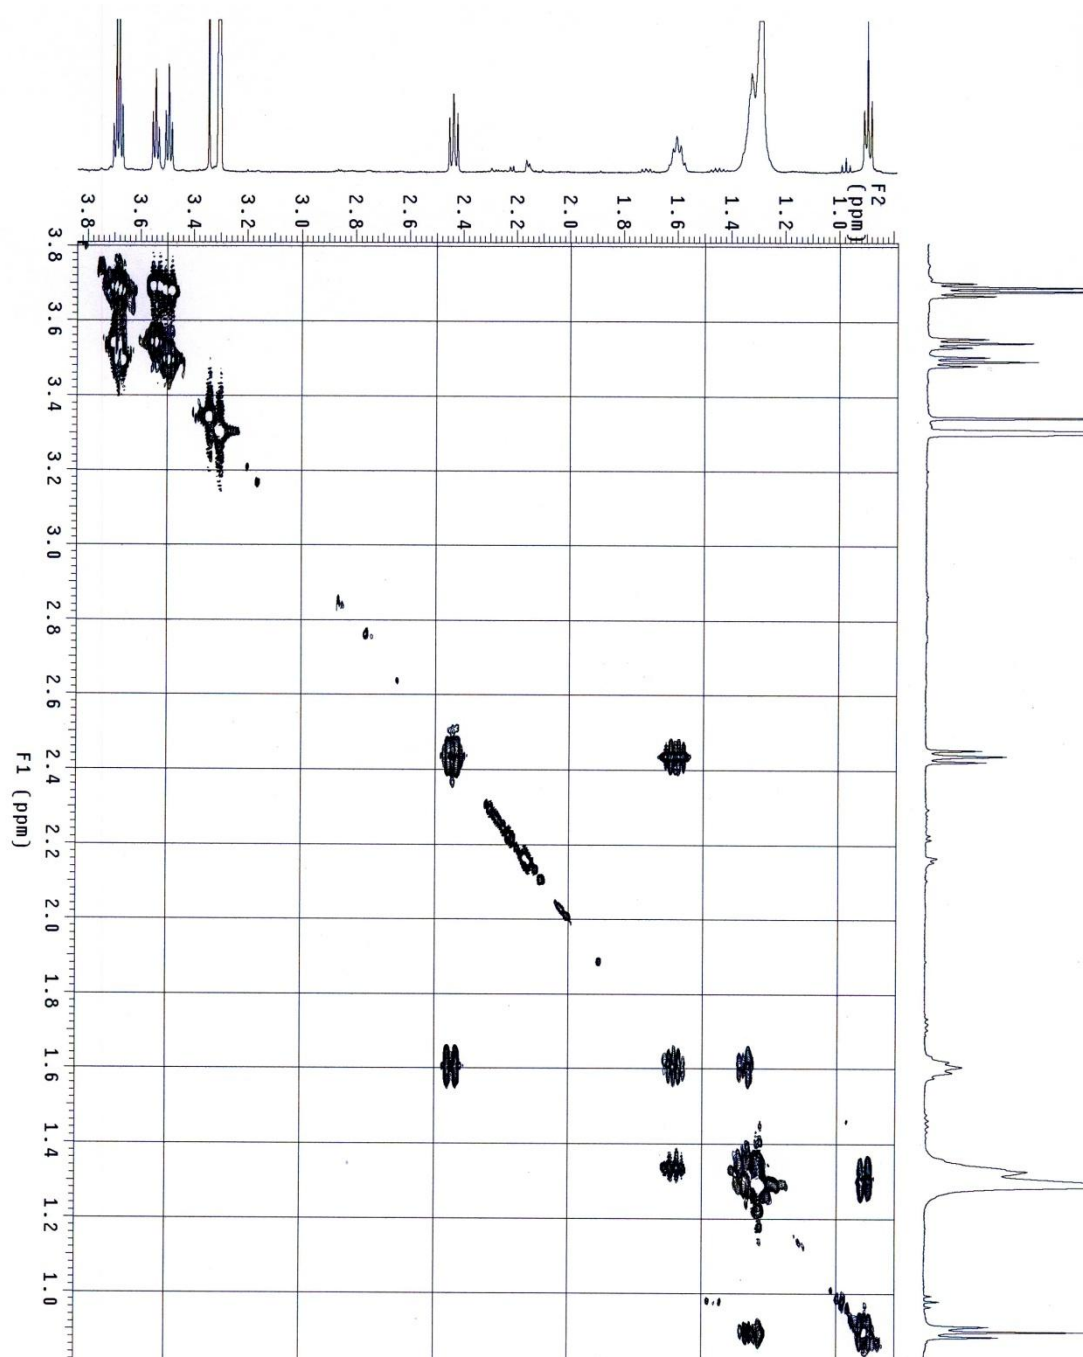

**Figure S5.** HSQC spectrum of compound **1** in CD<sub>3</sub>OD.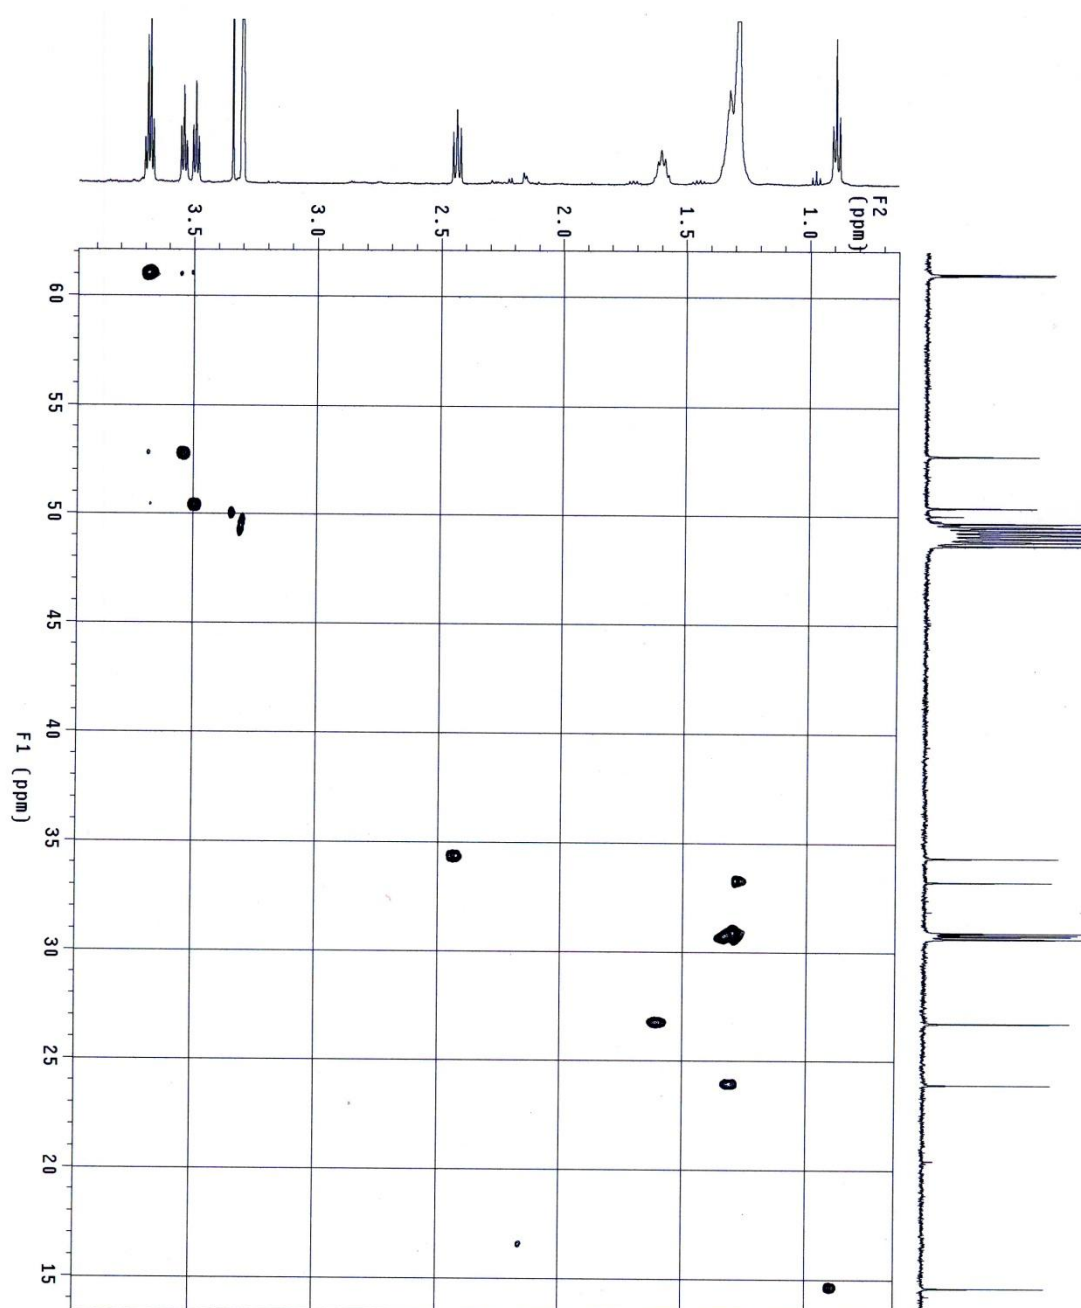

**Figure S6.** HMBC spectrum of compound **1** in CD<sub>3</sub>OD.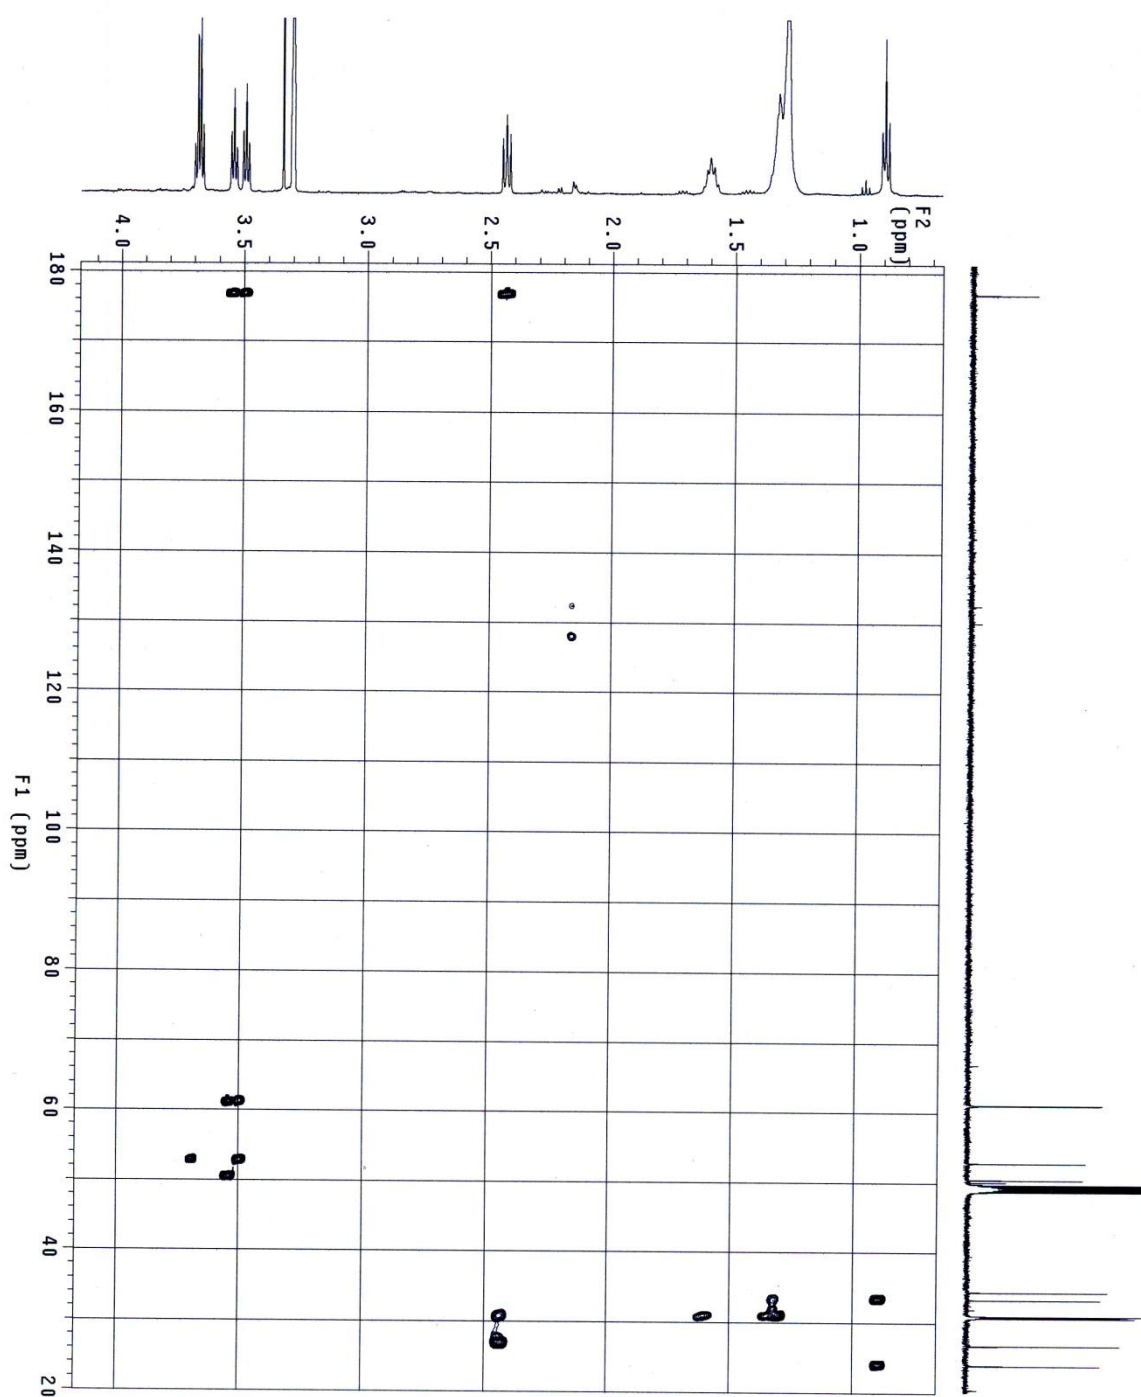

Figure S7. HRESIMS spectrum of compound 2.

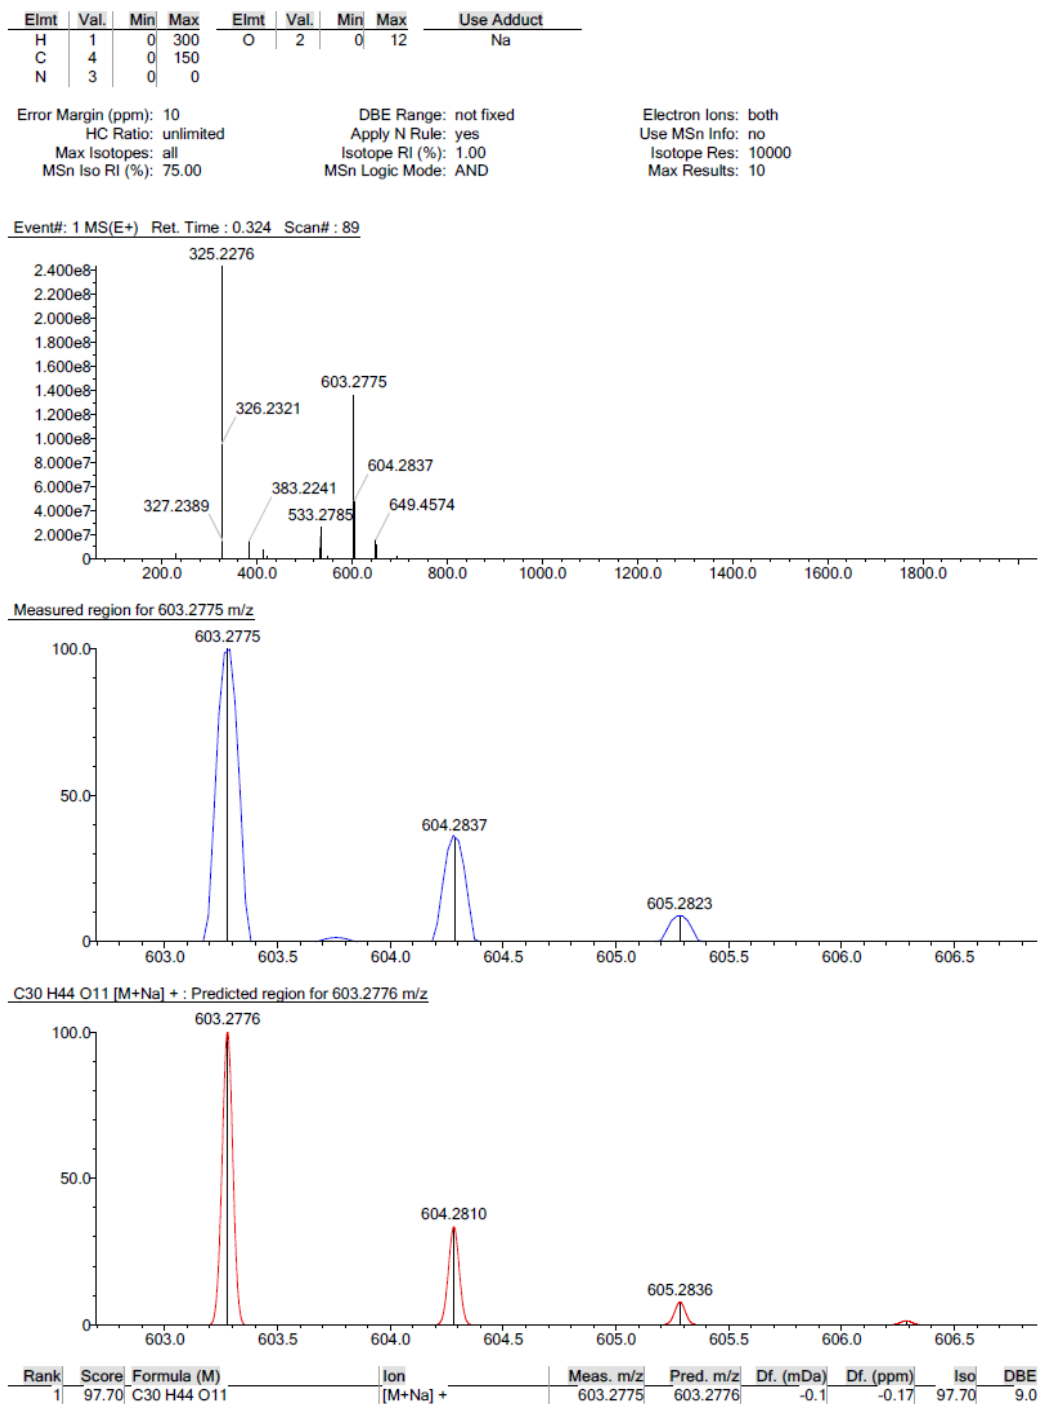

**Figure S8.**  $^1\text{H}$  NMR spectrum of compound **2** recorded in  $\text{CD}_3\text{OD}$  at 500 MHz.

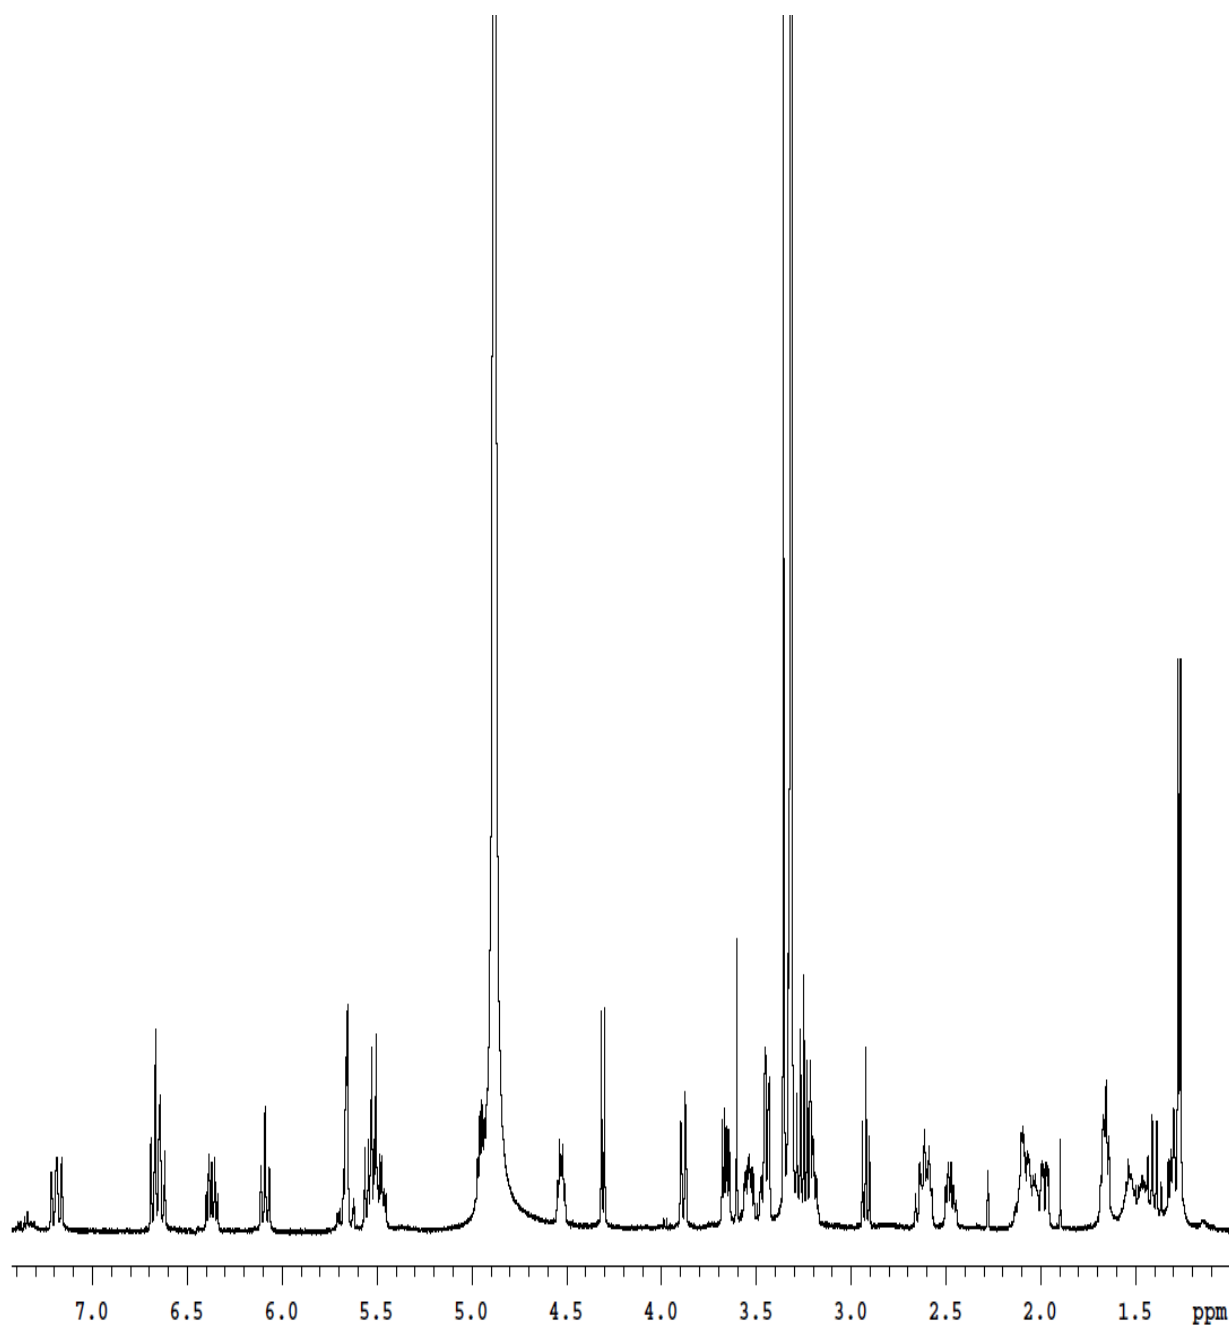



**Figure S9.**  $^{13}\text{C}$  NMR of compound **2** recorded in  $\text{CD}_3\text{OD}$  at 125 MHz.

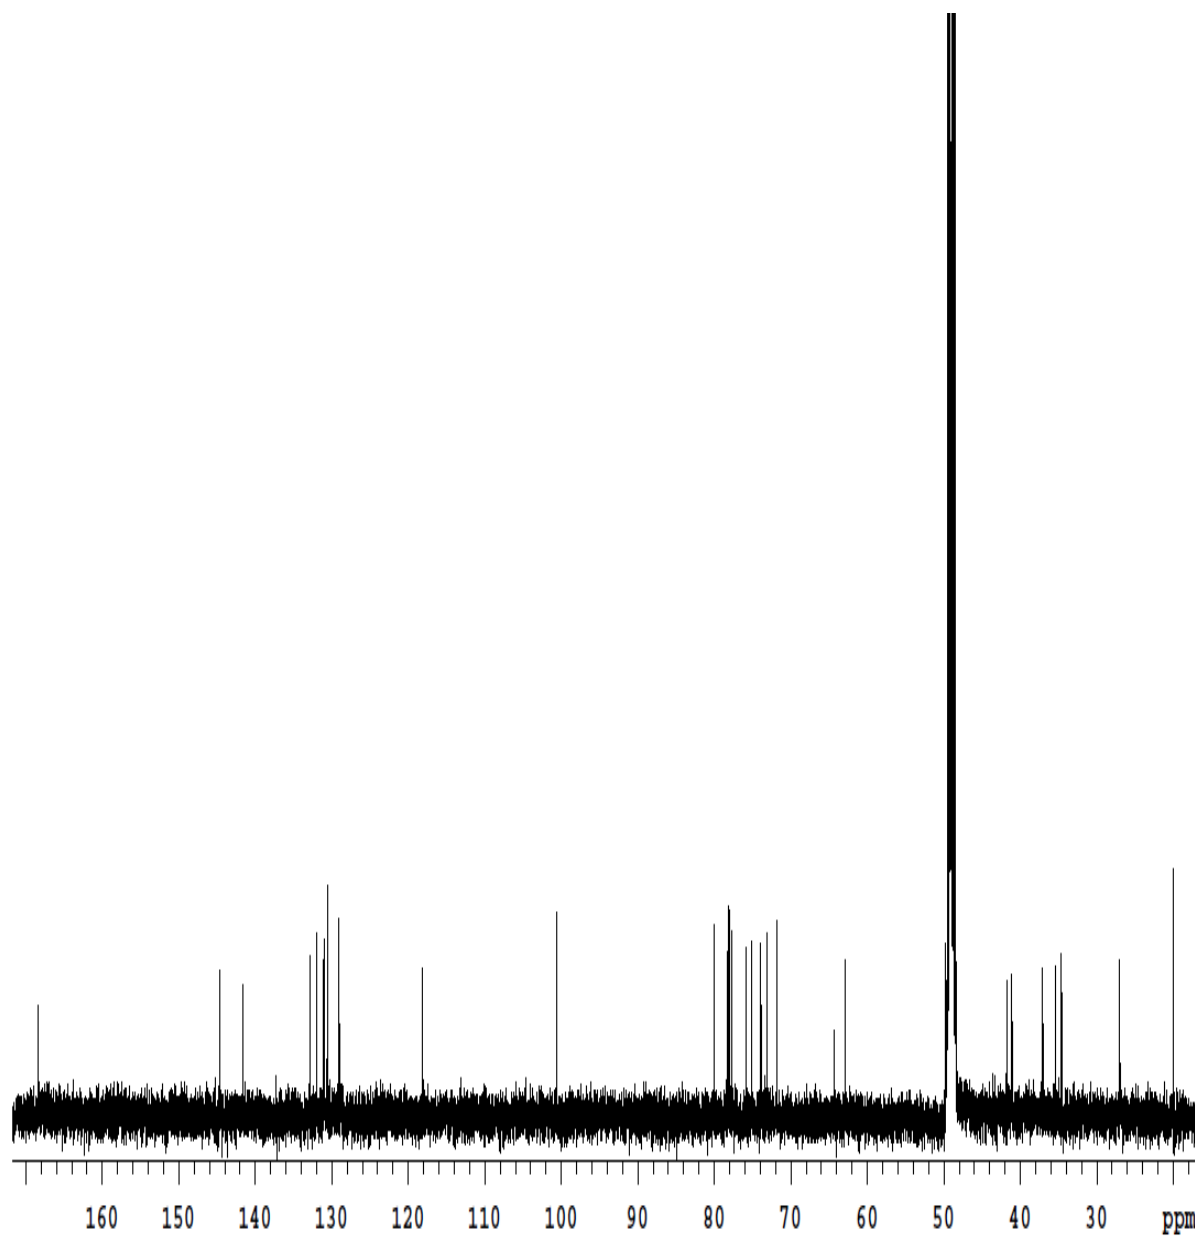

**Figure S10.** COSY spectrum of compound **2** in CD<sub>3</sub>OD.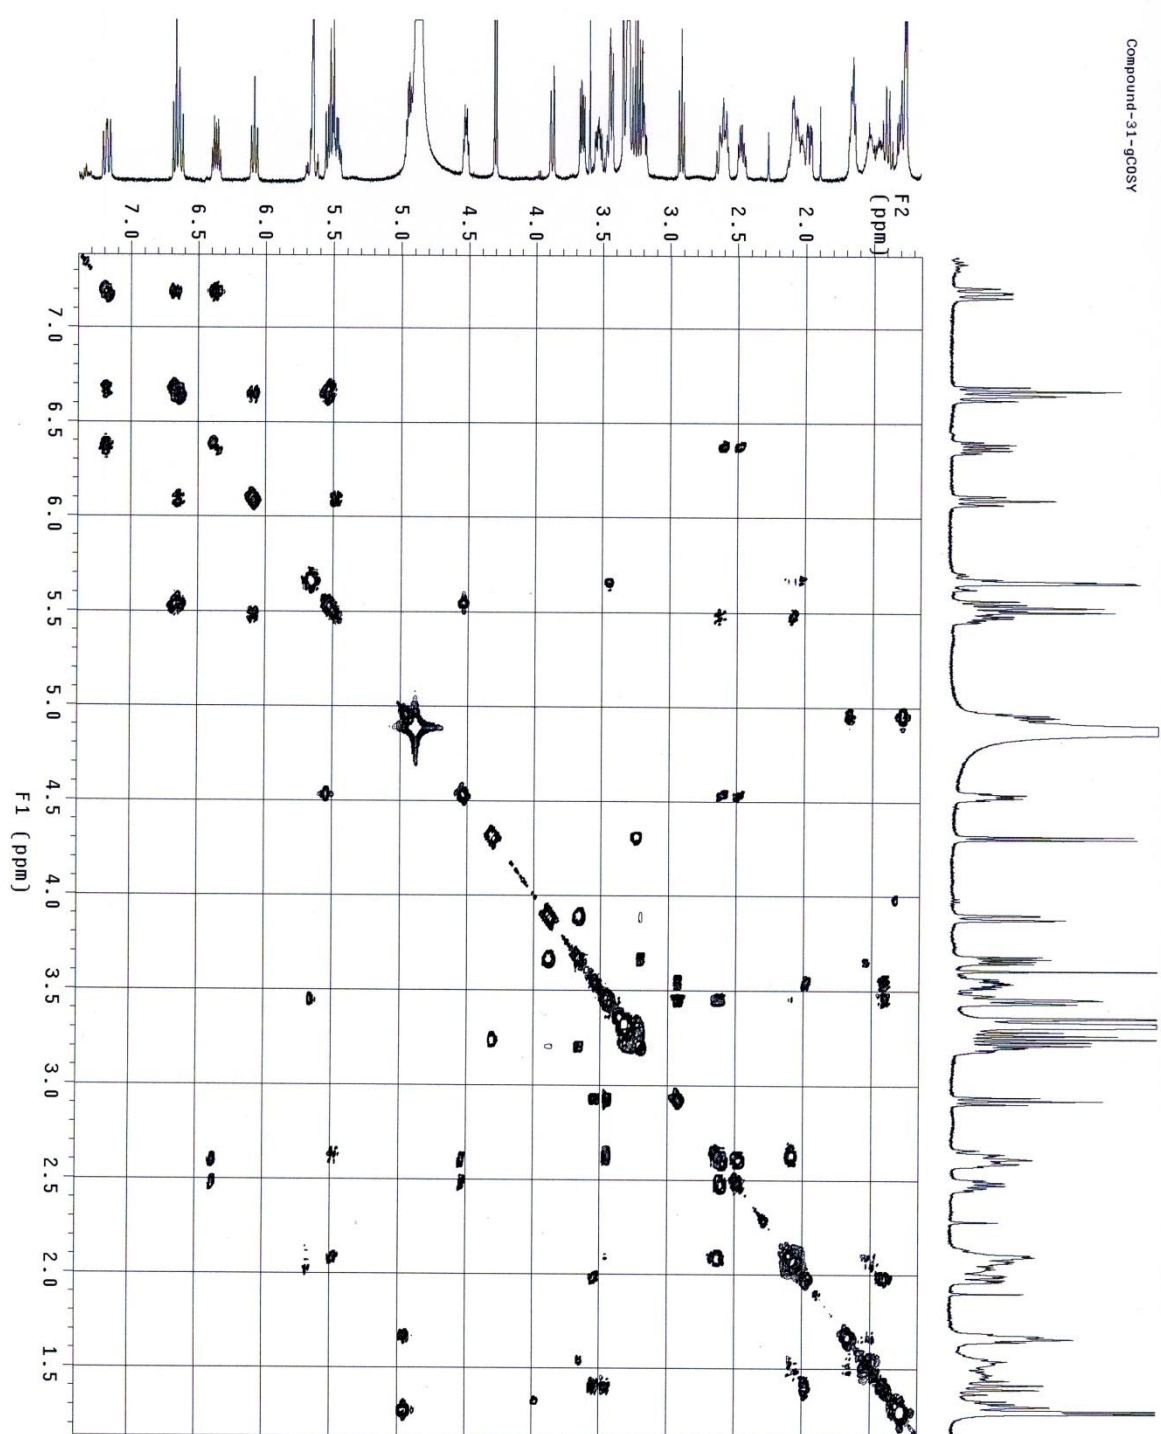

**Figure S11.** HSQC spectrum of compound **2** in CD<sub>3</sub>OD.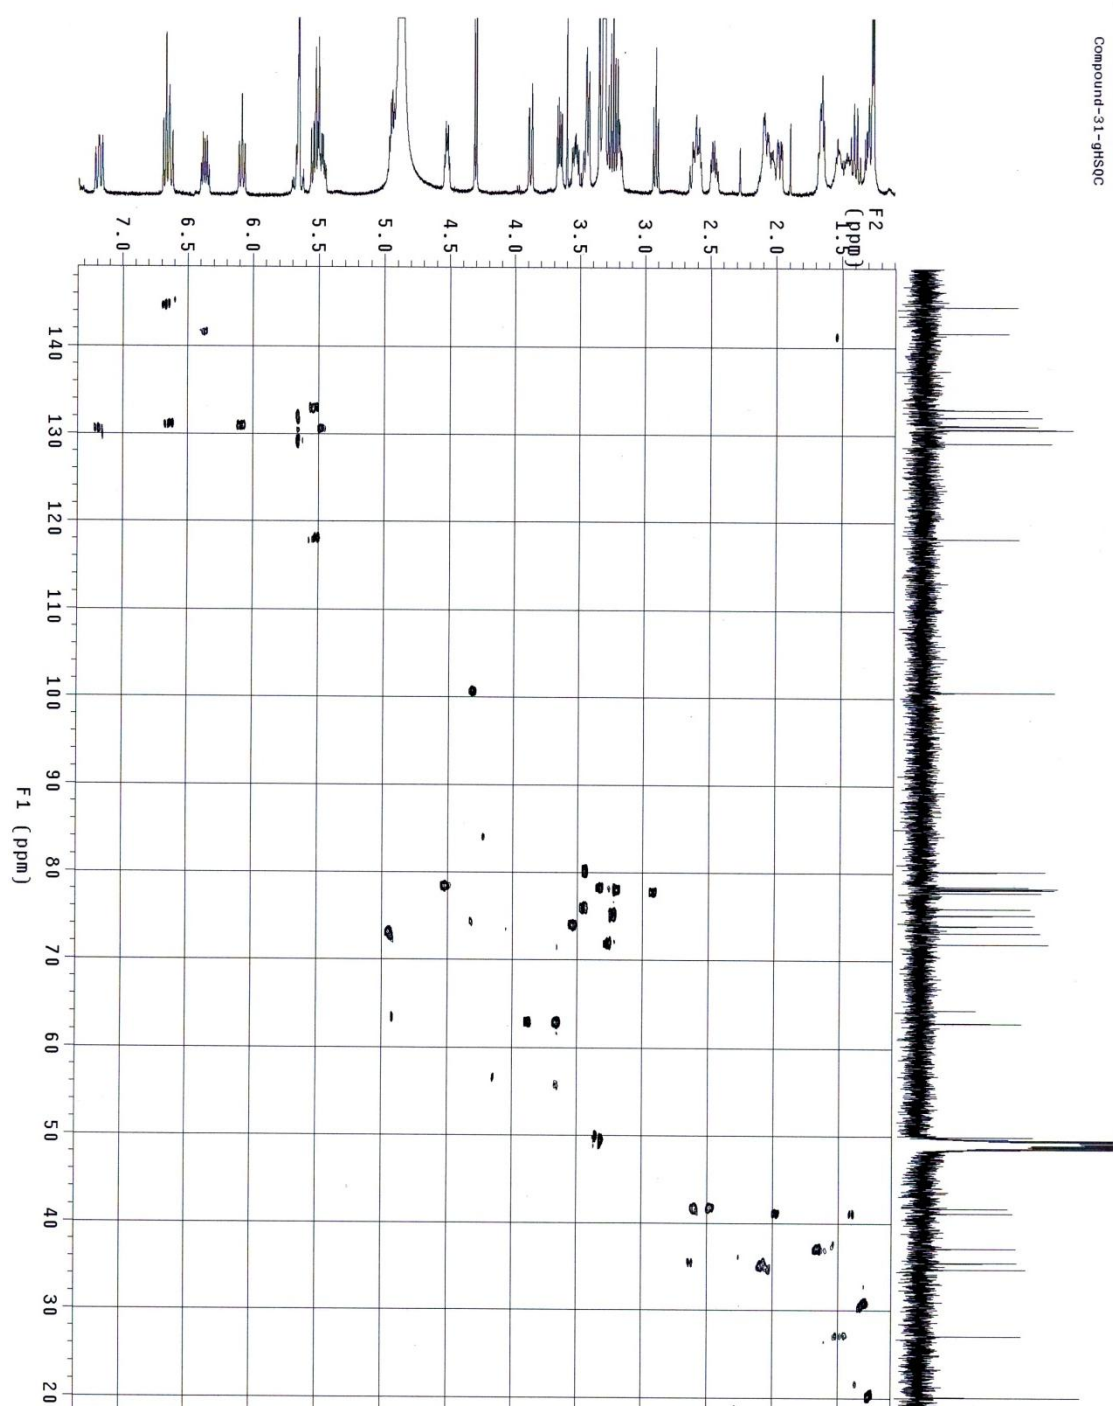

**Figure S12.** HRESIMS spectrum of compound **3**.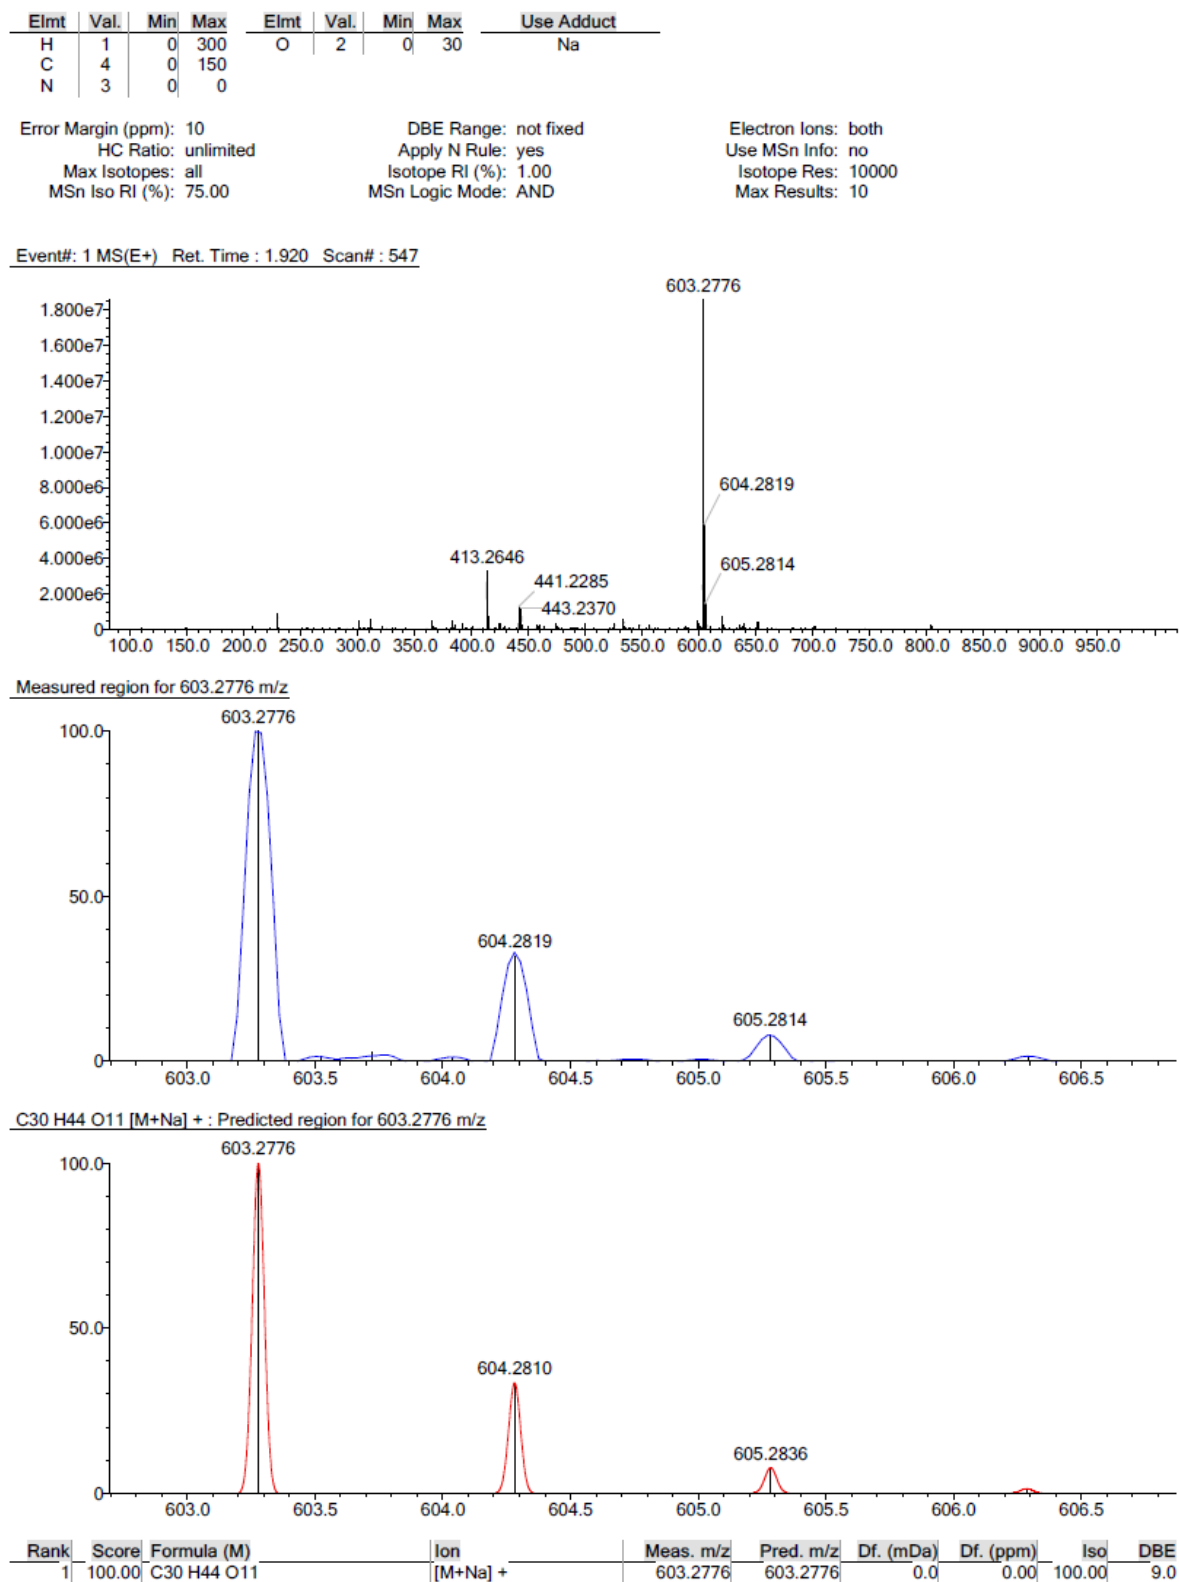

**Figure S13.**  $^1\text{H}$  NMR data of compound **3** recorded in  $\text{CD}_3\text{OD}$  at 500 MHz.

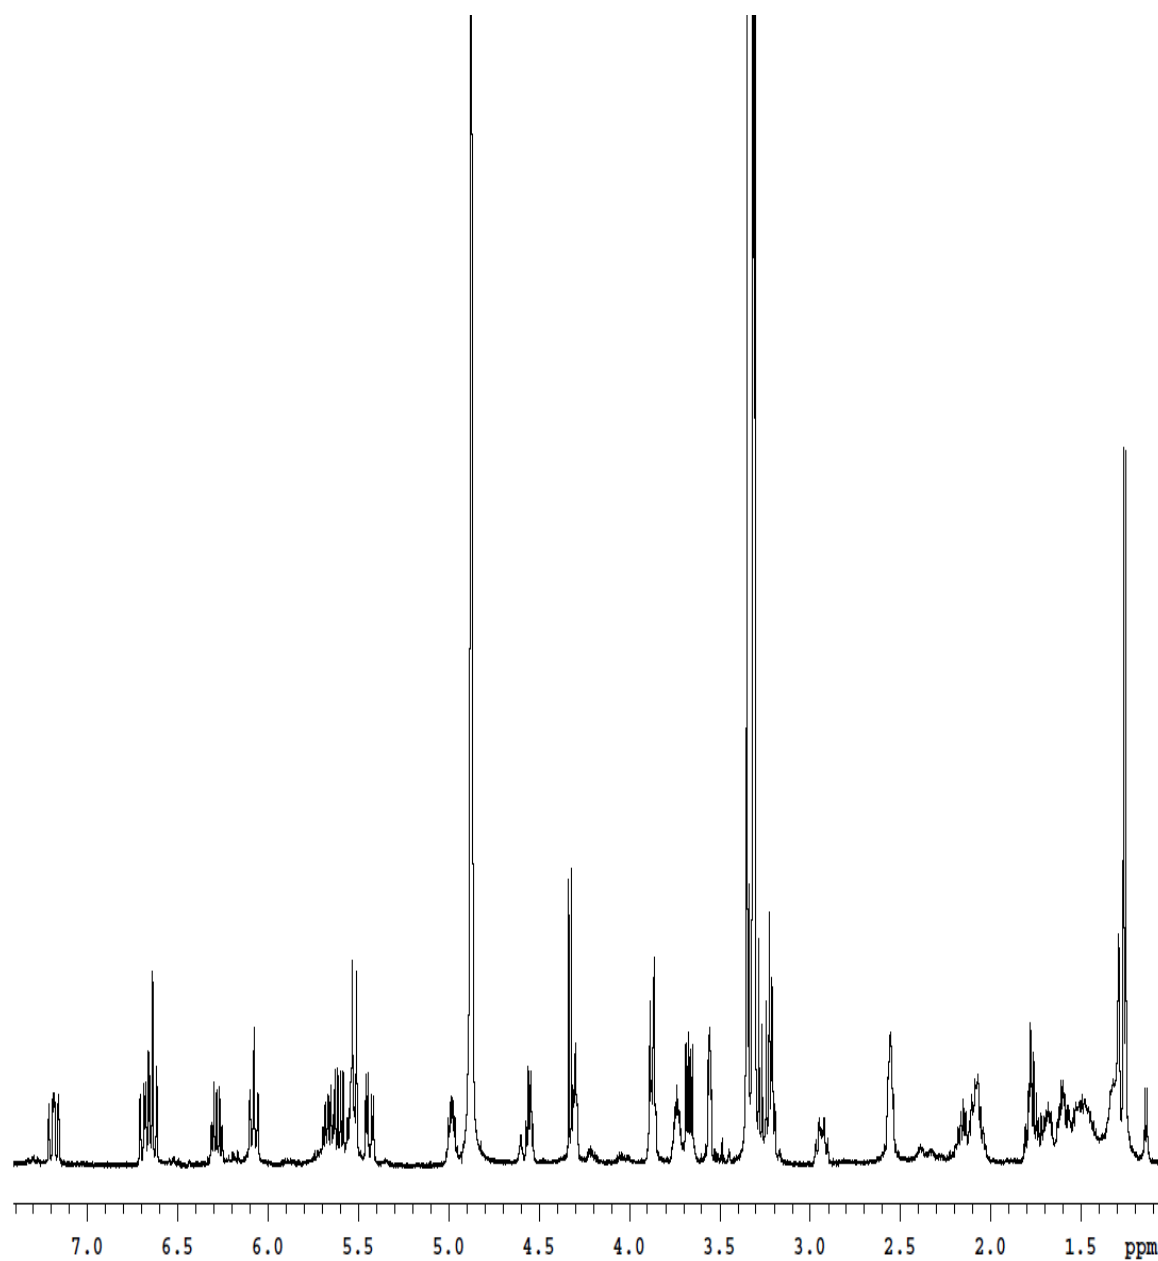

**Figure S14.**  $^{13}\text{C}$  NMR data of compound **3** recorded in  $\text{CD}_3\text{OD}$  at 125 MHz.

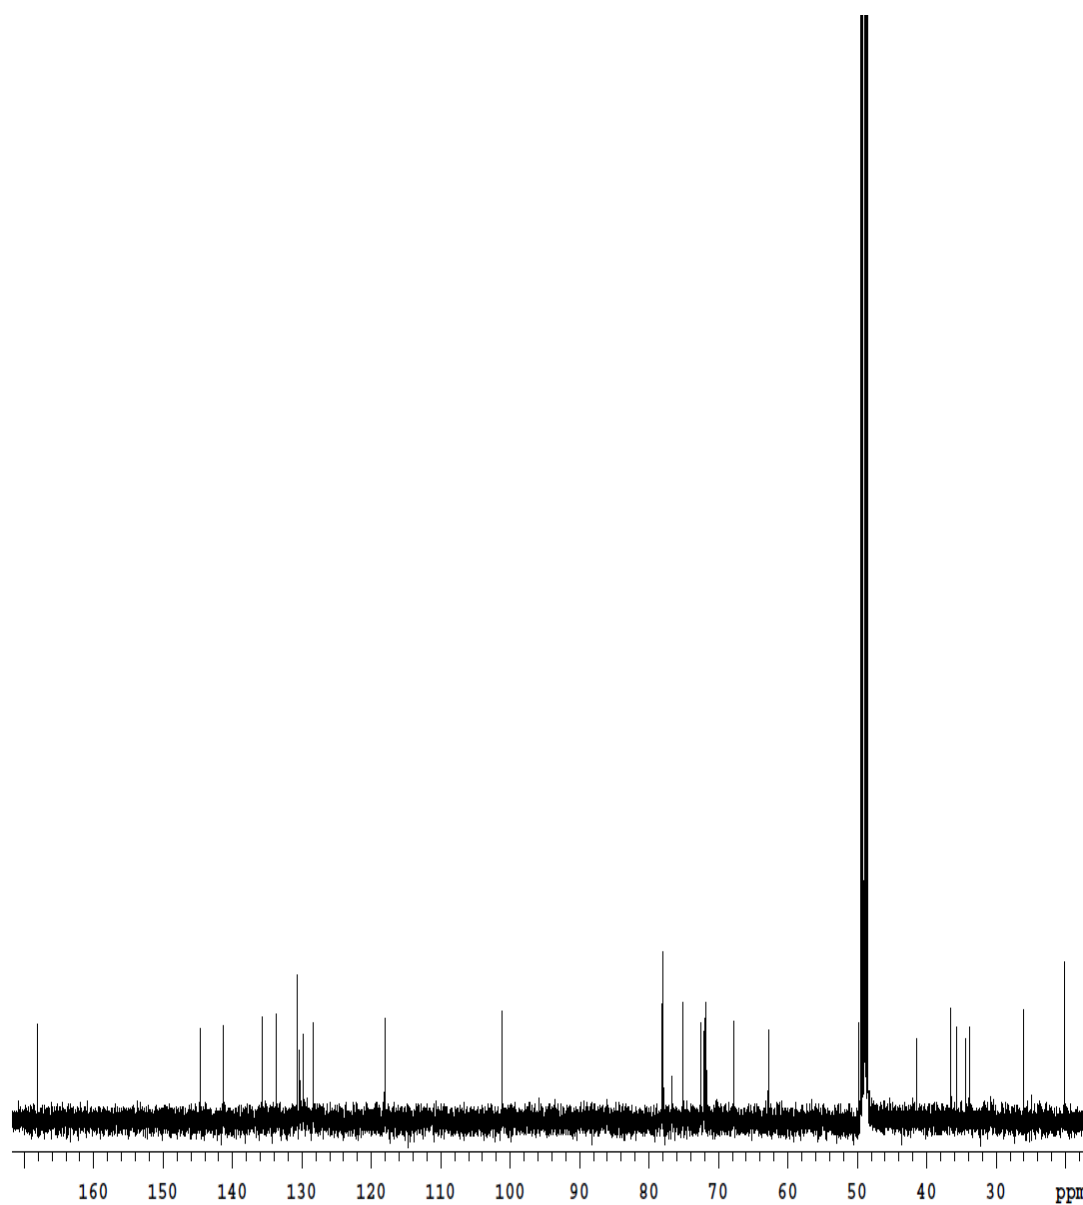

**Figure S15.** COSY spectrum of compound **3** in CD<sub>3</sub>OD.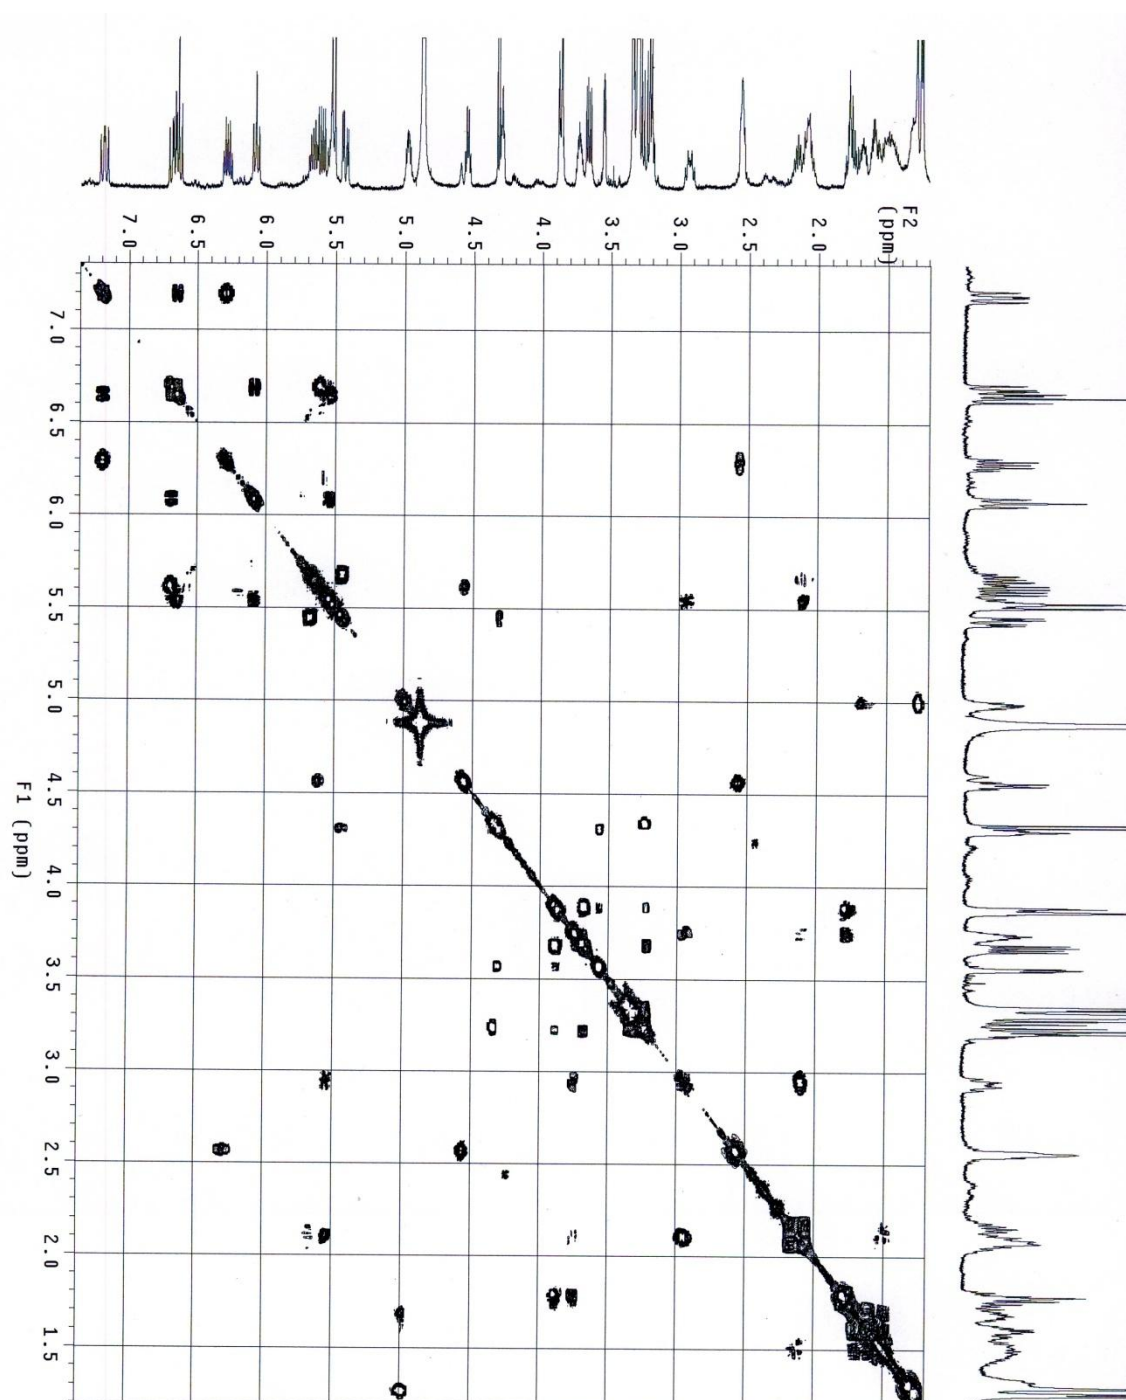

**Figure S16.** HSQC spectrum of compound **3** in CD<sub>3</sub>OD.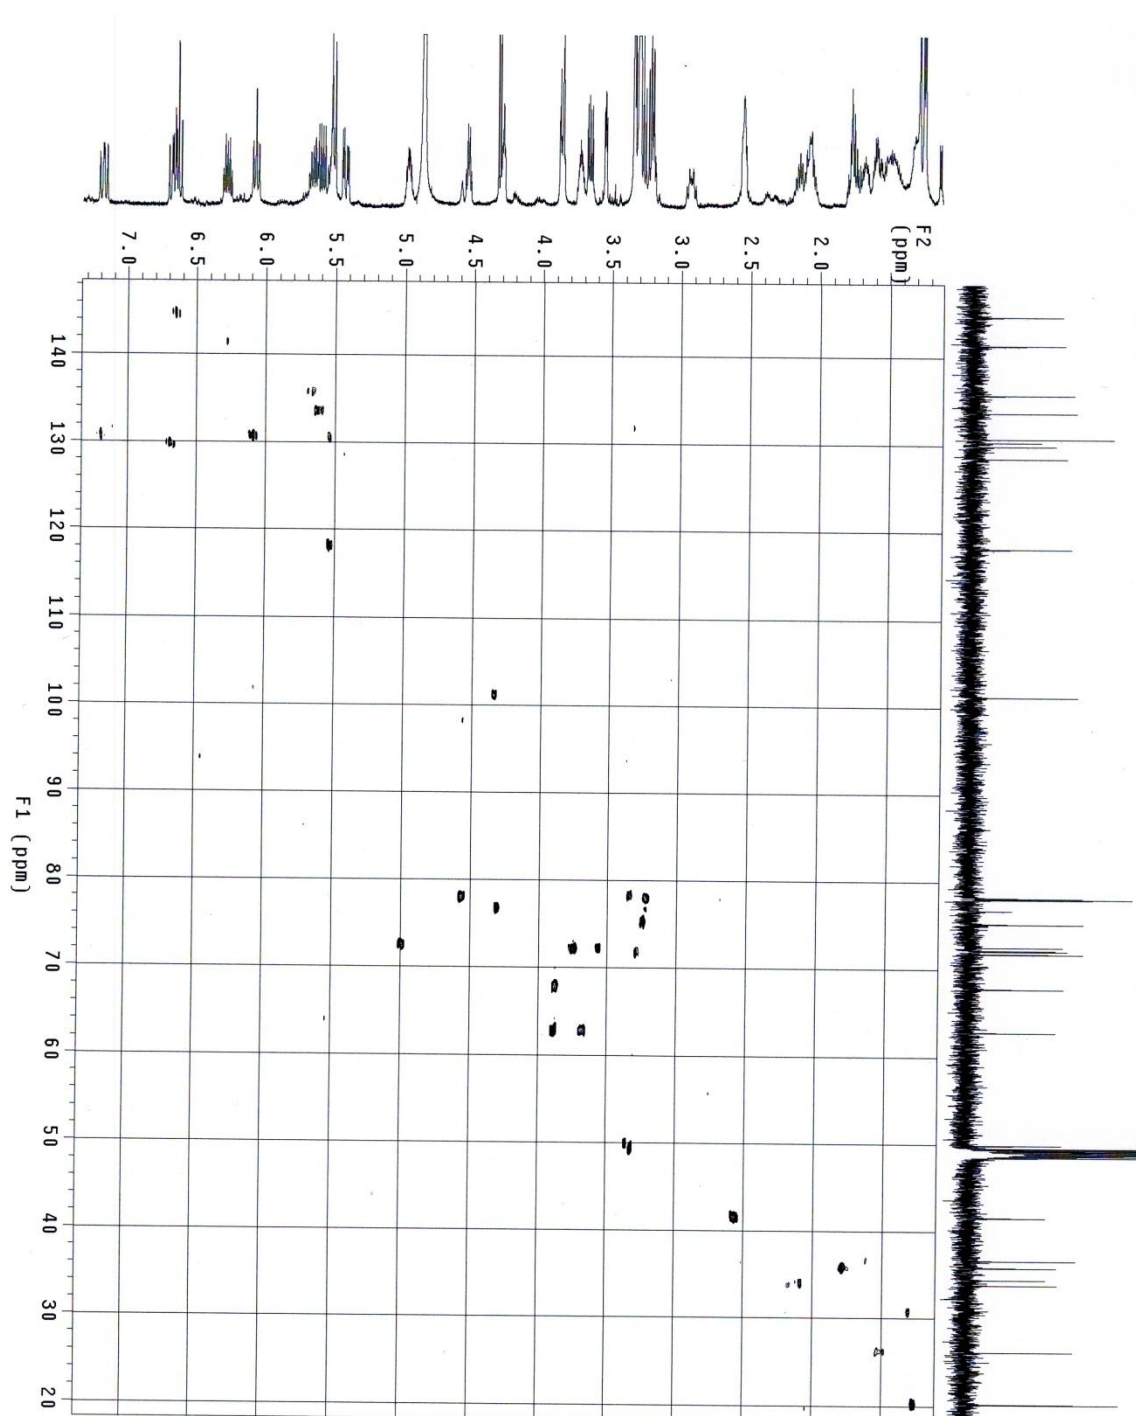

Supplement: s1 [file s1]
